# Supplementary material
Source: publisher figshare collection journal article supplement (https://acs.figshare.com/ndownloader/files/3769765)
Supplement: Supplementary file 1 [file 3769765]

**(Supporting Information)**

**In situ monitoring of anti-solvent co-crystallization by combining NIR and  
Raman spectroscopies**

Min-Jeong Lee, Nan-Hee Chun<sup>†</sup>, Min-Ju Kim, Paul Kim, Keon-Hyoung Song, Guang J. Choi\*

Department of Pharmaceutical Engineering, Soon Chun Hyang University, Asan, Chungnam 336-745, South Korea

\* Corresponding author.

(Tel) +82-41-530-4864. (Fax) +82-41-530-3085. (E-mail) [guangchoi@sch.ac.kr](mailto:guangchoi@sch.ac.kr)

<sup>†</sup> Present address: Unimed Pharm Inc., Asan, Chungnam, South Korea

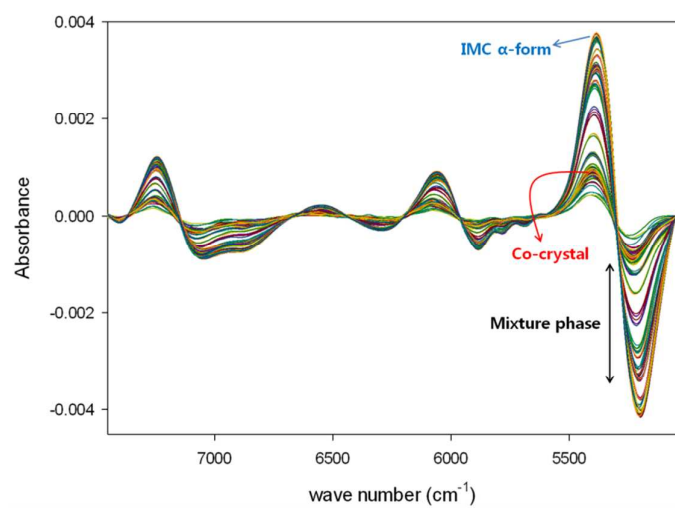

**Figure S-1:** Second derivatives of NIR spectra for IMC  $\alpha$ -form, IMC-SAC co-crystal and mixture phase collected during calibration batches.

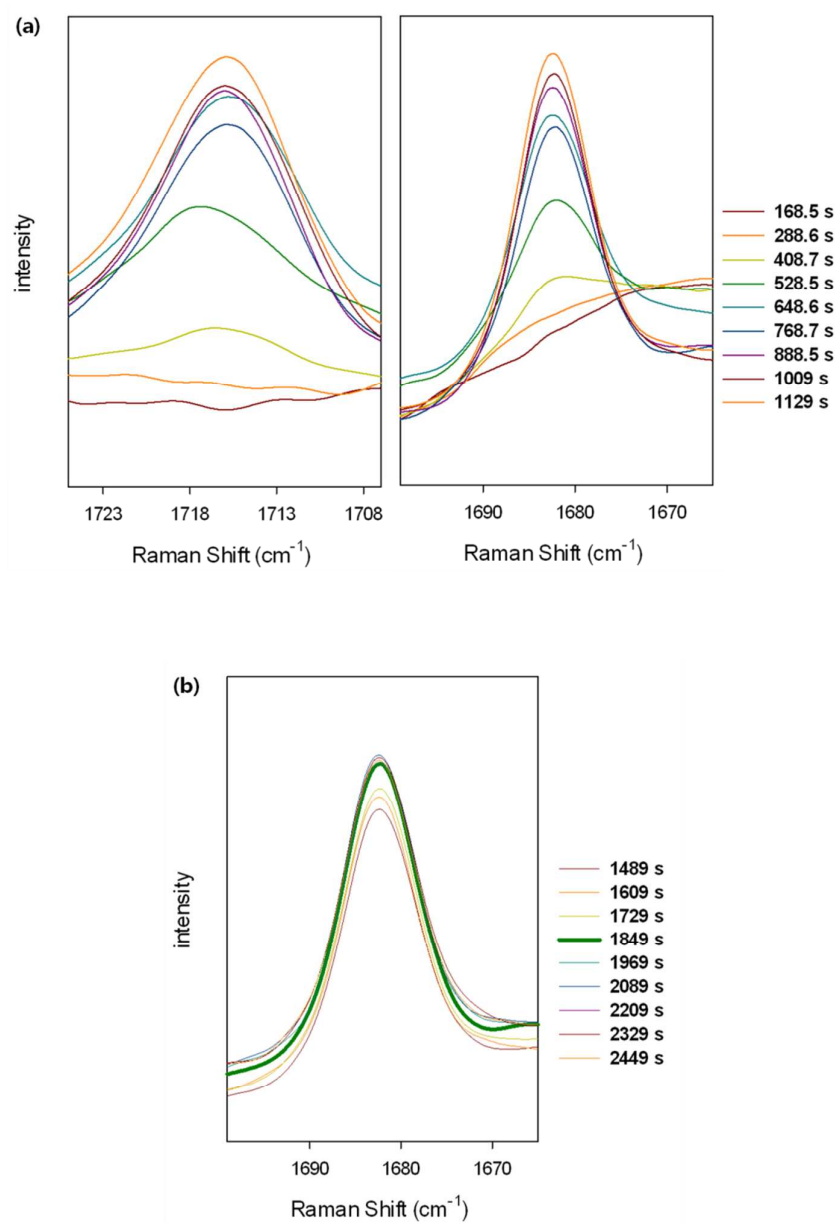

**Figure S-2:** Changes in the Raman peaks around 1717 cm<sup>-1</sup> and 1683 cm<sup>-1</sup> at (a) the nucleation period and (b) the stage of phase equilibrium during Exp 6.

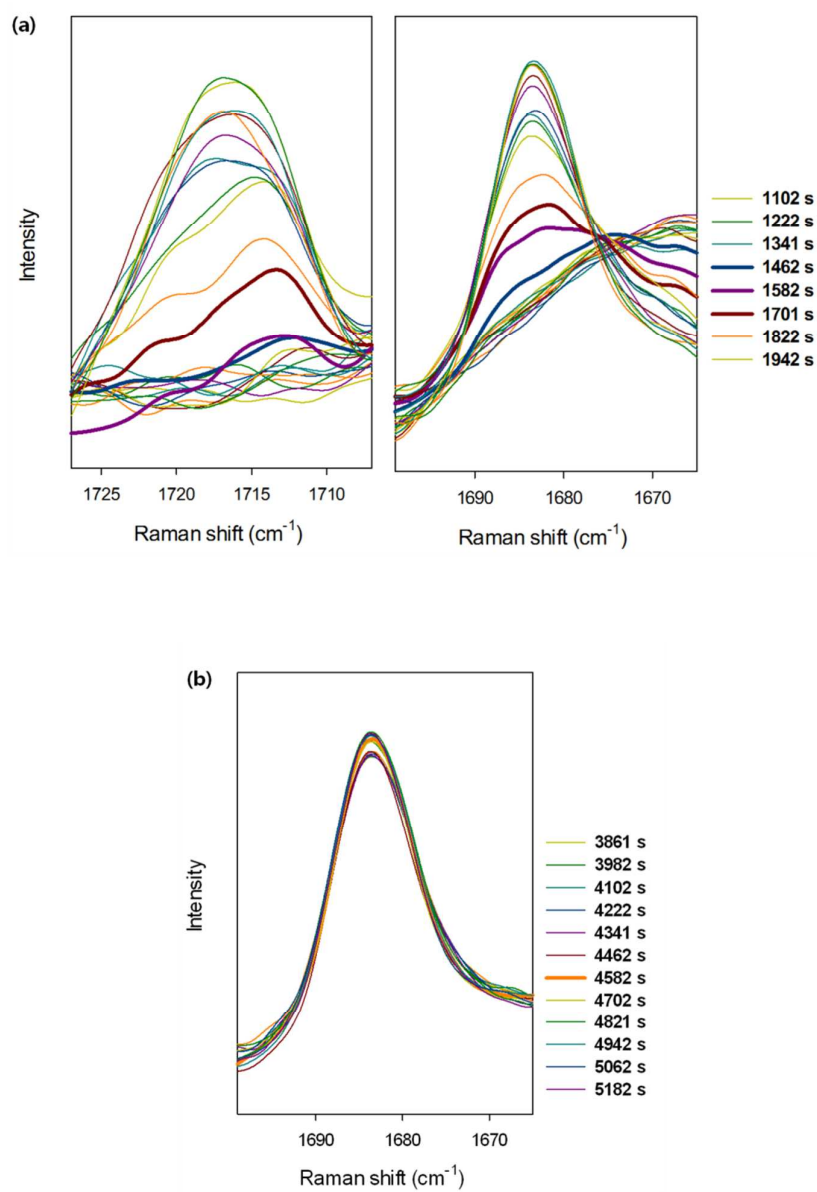

**Figure S-3:** Changes in the Raman peaks around 1717 cm<sup>-1</sup> and 1683 cm<sup>-1</sup> at (a) the nucleation period and (b) the stage of phase equilibrium during Exp 7.

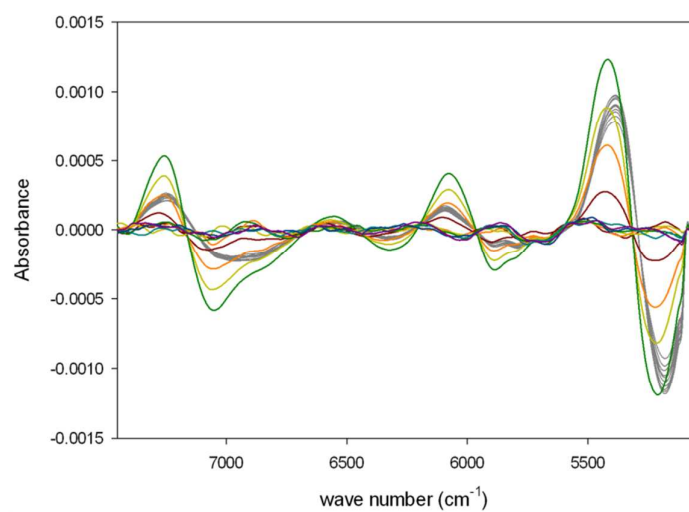

**Figure S-4:** Second derivatives of NIR spectra for IMC-SAC co-crystal (gray lines) and IMC a-form (color lines) collected in the initial stages of nucleation for Exp 6 and Exp 8, respectively.

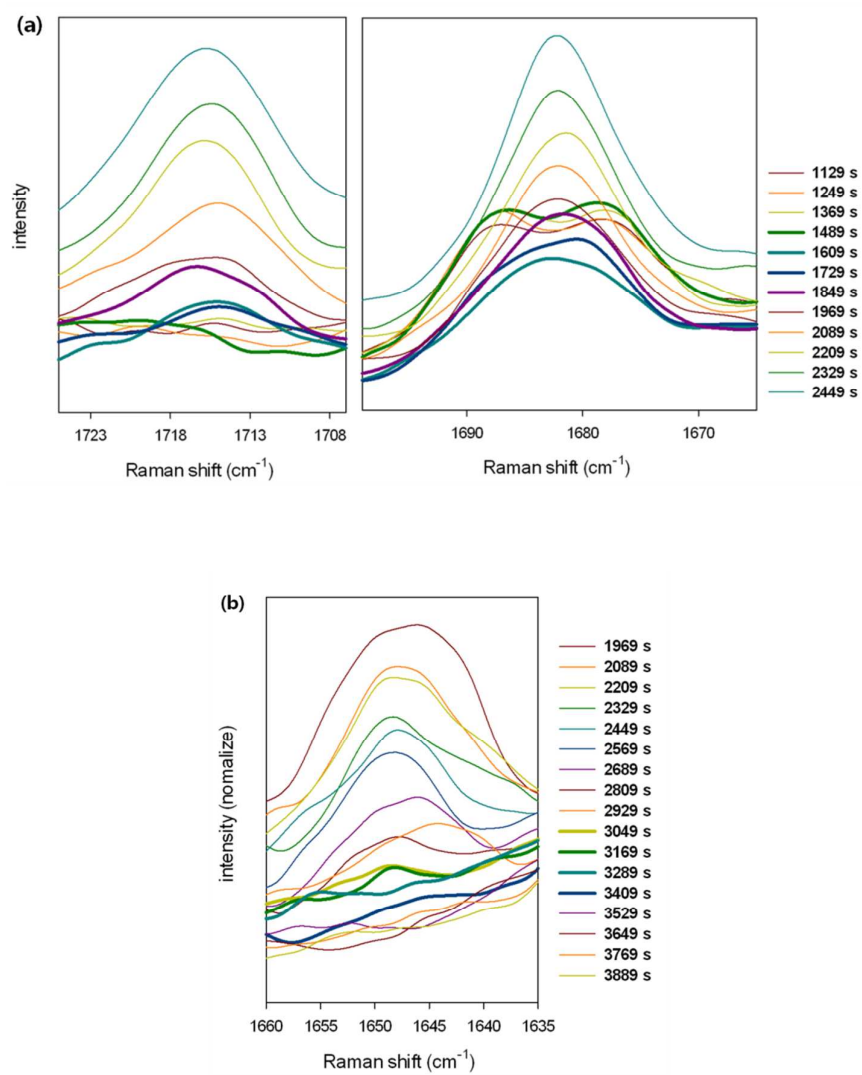

**Figure S-5:** Changes in Raman peaks (a) around of 1717 cm<sup>-1</sup> and 1683 cm<sup>-1</sup> at the time of co-crystal nucleation and (b) around of 1650 cm<sup>-1</sup> at the stage of the disappearance of IMC  $\alpha$ -form during Exp 8.
